# Supplementary material for: How do respondents of primary care surveys compare to typical users of primary care? A comparison of two surveys
Source: Springer Nature journal article supplement (doi:10.1186/s12875-023-02029-1), 2023-03-24
Supplement: MOESM1 [file 24672252]

**Supplementary File 1: A Brief Overview of Primary Care Models and Remuneration in Ontario**

| <b>Primary Care Delivery Model</b>      | <b>Composition and Characteristics</b>                                                                                                                                                                                                       | <b>Physician Compensation Model</b>                                                                                           | <b>Patient enrolment required (Rostring*)</b> |
|-----------------------------------------|----------------------------------------------------------------------------------------------------------------------------------------------------------------------------------------------------------------------------------------------|-------------------------------------------------------------------------------------------------------------------------------|-----------------------------------------------|
| <b>Fee for Service (FFS)</b>            | Solo physicians compensated for services performed according to the Schedule of Benefits.                                                                                                                                                    | Fee-for-service                                                                                                               | No                                            |
| <b>Comprehensive Care Model (CCM)</b>   | Solo physicians providing comprehensive primary care services to enrolled patients and some after hours care.                                                                                                                                | Fee-for-service based plus after-hours premiums. Monthly capitation payments for enrolled patients.                           | Yes                                           |
| <b>Family Health Group (FHG)</b>        | Groups of physicians (3 or more) providing comprehensive care to enrolled patients on a 24/7 basis (through office hours and Telephone Health Advisory Services).                                                                            | Fee for service plus after hours and comprehensive care premiums and bonuses, plus monthly comprehensive capitation payments. | Voluntary patient enrolment.                  |
| <b>Family Health Network (FHN)</b>      | Groups of 3 or more physicians providing comprehensive care to patients through office hours and Telephone Health Advisory Service.<br><i>*The main difference between FHN and FHO is the base rate payment and basket of core services.</i> | Capitated payments and fee-for-service.                                                                                       | Yes                                           |
| <b>Family Health Organization (FHO)</b> | Groups of 3 or more physicians, providing care through regular and extended office hours, and nurse staffed Telephone Health Advisory Service.<br><i>*The main differences between FHN and FHO are the base rate payment</i>                 | Blended capitation model, with additional payments for delivering targeted care services.                                     | Yes                                           |

|                                      |                                                                                                                         |                                                                                                                                                                |                                                       |
|--------------------------------------|-------------------------------------------------------------------------------------------------------------------------|----------------------------------------------------------------------------------------------------------------------------------------------------------------|-------------------------------------------------------|
|                                      | <i>and the basket of core services.</i>                                                                                 |                                                                                                                                                                |                                                       |
| <b>Family Health Team (FHT)</b>      | Team of 3 or more physicians, with interdisciplinary health providers (nurses, social workers, dietitians, and others). | Physicians must be practicing within FHN or FHO, Blended capitation model, blended salary model, or complement-based remuneration plus bonuses and incentives. | Yes                                                   |
| <b>Community Health Centre (CHC)</b> | Team of physicians and interdisciplinary health providers. Health promotion and community programs also offered.        | Salary                                                                                                                                                         | Yes, but also serves individuals who are not rostered |
| <b>Other Model</b>                   | Other group models, including Community Health Group, Group Health Centre, and Rural and Northern Physician Group       | Various                                                                                                                                                        | Various                                               |

**From:** Li A, Cronin S, Bai YQ, Walker K, Ammi M, Hogg W, et al. Assessing the representativeness of physician and patient respondents to a primary care survey using administrative data. *BMC Fam Pract.* 2018;19(77):1–10

**Sources:** Marchildon GP, Hutchison B. Primary care in Ontario, Canada: New proposals after 15 years of reform. *Health Policy (New York)* [Internet]. 2016;120(7):732–8. Available from: <http://dx.doi.org/10.1016/j.healthpol.2016.04.010>

Rudoler D, Peckham A, Grudniewicz A, Marchildon G. Coordinating primary care services: A case of policy layering. *Health Policy (New York)* [Internet]. 2019;123(2):215–21. Available from: <https://doi.org/10.1016/j.healthpol.2018.12.002>
